# Supplementary material for: Flow alteration strategies for complex basilar apex aneurysms: multicenter experience, systematic review, and insights from computational fluid dynamics
Source: Research Square preprint supplement (doi:10.21203/rs.3.rs-7248899/v1), 2025-10-10
Supplement: Supplementary file 1 [file 748c6d7b4f11292804cb8471.docx]

**Supplemental Material 3, Table.** Summary of included cases of complex basilar apex aneurysms treated with flow alteration strategies.

| Author (year) | Case No. | Age, sex | Aneurysm size (mm) | Initial symptoms | Previous interventions | Procedure | Complications | Initial/FU mRS scores | FU period (mos) | FU image findings |
| --- | --- | --- | --- | --- | --- | --- | --- | --- | --- | --- |
| Present series, 2025 | 1 | 61/F | 38.5 | Loss of consciousness | Ventriculo-peritoneal shunt | Surgical BA occlusion | Lt. paramedian pontine perforator infarction | 2/3 | 60 | Virtually complete thrombosis |
| Present series, 2025 | 2 | 62/F | 15.4 | Lt. side weakness | None | Surgical BA occlusion | None | 2/0 | 55 | Incomplete thrombosis |
| Present series, 2025 | 3 | 65/F | 19.9 | Lt. hand tremor and gait disturbance | Coil embolization 3 months before the surgery | Lt. STA-SCA bypass and surgical BA occlusion | None | 1/1 | 75 | Virtually complete obliteration |
| Present series, 2025 | 4 | 69/F | 21.1 | Headache | Coil embolization 2 months before the surgery | Surgical BA occlusion | postoperative 1-day, acute infarction in the bilateral SCA territories | 2/6 | 3 | NA |
| Present series, 2025 | 5 | 76/F | 22.11 | Incidental finding | None | Surgical BA occlusion with Lt. STA-RAG-PCA bypass | Rt. Paramedian pontine perforator infarction, bypass graft occlusion | 0/4 | 8 | Incomplete thrombosis |
| Present series, 2025 | 6 | 61/F | 45.9 | Headache | A total of 3 times repeated coil embolization, ventriculo-peritoneal shunt | Surgical BA occlusion with Lt. M2-RAG-SCA bypass | None | 4/3 | 12 | Virtually complete thrombosis |
| Ewald, 2000 [9] | 1 | NA | 40 | Incidental finding | Aborted coil embolization | 2 stage procedures:  Lt. STA-PCA bypass and proximal occlusion of the Lt. P1,  coil embolization of the aneurysm | None | 2/2 | 6 | Complete obliteration |
| 2 | NA | 40 | Headache, visual disturbance | None | 2 stage procedures:  Rt. STA-PCA bypass and proximal occlusion of the Rt. P1,  coil embolization of the aneurysm | None | 2/0 | 6 | Complete obliteration |
| 3 | NA | NA | Tetraparesis, visual and swallow disturbance | Ventriculo-peritoneal shunt, partial coil embolization | Lt. STA-PCA bypass and endovascular BA occlusion | Lt. oculomotor nerve palsy | 4/4 | 2 | Complete obliteration |
| Hoh, 2001 [13] | 1 | NA | Giant | NA | NA | Staged endovascular occlusion of the bilateral VAs | NA | NA/3 | NA | NA |
| 2 | NA | Giant | NA | NA | Staged endovascular occlusion of single VA and surgical BA occlusion | NA | NA/3 | NA | NA |
| Lawton, 2002 [21] | 1 | NA | NA | NA | None | Surgical BA occlusion | Midbrain infarction | NA/6 | NA | NA |
| 2 | NA | Giant | NA | Coil embolization | STA-PCA bypass and recoiling of the aneurysm | Did not improve neurologically → support withdrawn | NA/6 | NA | NA |
| Russel, 2002 [35] | 1 | 45/M | 30 | Headache | Coil embolization | Surgical BA occlusion | None | 3/1 | 42 | No coil compaction or aneurysm recanalization |
| Evans, 2004 [8] | 1 | 71/F | Large | SAH | None | Rt. MCA-RAG-PCA bypass and direct clipping of the aneurysm with sacrifice of the Rt. PCA origin | None | 4/3 | 8 | NA (died of acute subdural hematoma due to fall) |
| Yasui, 2004 [46] | 1 | 40/M | Giant | SAH | Wrapping, a total of 4 times repeated coil embolization | Surgical BA occlusion | Pontine infarction 4 days after the surgery | 3/6 | 9 | Virtually complete thrombosis |
| Ponce, 2004 [32] | 1 | 51/M | Giant | Dysmetria | NA | 2 stage procedures:  STA-SCA bypass,  endovascular occlusion of both VAs | None | 2/0 | 43 | NA |
| 2 | 51/F | Giant | Aphasia, Rt. arm weakness | None | 3 staged procedures:  Rt. proximal P1 occlusion,  stent insertion from Lt. PCA to BA,  coil embolization | None | 3/3 | 2 | NA (died of underlying lung cancer) |
| Kellner, 2011 [19] | 1 | 39/F | 30 | Quadriparesis | Coil embolization | Surgical BA occlusion | Midbrain infarction | NA/6 | 0 | NA |
| 2 | 62/F | 8 | Arm weakness | None | Surgical BA occlusion | None | 2/0 | NA | NA |
| 3 | 51/M | 40 | Hemiplegia | A total of 3 times repeated coil embolization | Surgical BA occlusion | Transient quadriparesis and reduced level of consciousness | 4/0 | 60 | NA |
| 4 | 48/F | 15 | Unilateral hearing loss | None | Surgical BA occlusion | Transient internuclear ophthalmoplegia | 1/0 | 12 | Complete obliteration |
| 5 | 41/M | 30 | Gait apraxia | None | Surgical BA occlusion | Midbrain infarction | 2/1 | 18 | Stable filling |
| 6 | 51/F | 15 | Incidental | NA | Surgical BA occlusion | None | 0/1 | NA | NA |
| 7 | 24/F | 20 | Headache | Clipping | Surgical BA occlusion | None | 2/0 | 6 | Virtually complete thrombosis |
| 8 | 50/F | 12 | Headache | NA | Surgical BA occlusion | None | 1/0 | NA | NA |
| 9 | 65/F | 9 | Incidental | NA | Surgical BA occlusion | None | 0/0 | NA | NA |
| Miyamoto, 2011 [28] | 1 | 29/M | 35 | Oculomotor nerve palsy, hemiparesis | Surgical BA occlusion | Lt. STA-SCA bypass and Lt. SCA proximal occlusion | None | 2/0 | 24 | Complete thrombosis and marked shrinkage |
| 2 | 37/F | 45 | Character change | Endovascular BA and PPTA occlusion | 2 stage procedures:  Lt. STA-SCA bypass and Lt. SCA proximal occlusion,  Rt. STA-SCA and Rt. STA-PCA bypasses and Rt. SCA proximal and BA occlusion | None | 3/0 | 15 | Complete thrombosis and marked shrinkage |
| 3 | 65/F | 25 | Oculomotor nerve palsy, hemiparesis | None | 2 stage procedures:  Lt. STA-SCA bypass and Lt. SCA proximal and Lt. P1 occlusion,  Rt. STA-SCA and Rt. STA-PCA bypasses and Rt. SCA proximal and BA occlusion | Transient progression of hemiparesis | 3/4 | 4 | Complete thrombosis and stabilization |
| 4 | 68/M | 38 | Oculomotor nerve palsy | Surgical BA occlusion | Rt. STA-SCA bypass and Rt. SCA proximal occlusion | None | 3/3 | 15 | Enlargement of residual lumen and aneurysm size |
| 5 | 26/F | 30 | SAH, diplopia | None | 2 stage procedures:  Lt. STA-SCA bypass and Lt. STA proximal occlusion,  Rt. STA-SCA bypass and Rt. SCA proximal and BA occlusion | None | 2/0 | 12 | Complete thrombosis and marked shrinkage |
| 6 | 54/M | 28 | Diplopia | None | 2 stage procedures:  Rt. STA-SCA bypass and Rt. SCA proximal occlusion,  Lt. STA-SCA and Lt. STA-PCA bypasses and Lt. P1 proximal and BA occlusion | Small thalamic infarct | 2/3 | 9 | Complete thrombosis and moderate shrinkage |
| Sekhar, 2013 [36] (Ramanathan 2010 [33], Mai 2013 [23]) | 1 | 78/F | 25 | Memory difficulty, gait ataxia, oculomotor nerve palsy | A total of 5 times repeated coil embolization | Rt. MCA-RAG-PCA bypass and direct clipping of the aneurysm with sacrifice of the Rt. PCA origin | Transient neurological decline | 3/2 | 48 | Complete obliteration |
| Sekhar, 2013 [36] (Ramanathan, 2010 [33]) | 2 | 67/F | 32.2 | Progressive deterioration in daily abilities | A total of 4 times repeated coil embolization | Rt. V3-SVG-PCA bypass and surgical BA occlusion | None | 5/3 | 18 | Minimal remnant of the aneurysm |
| Sekhar, 2013 [36] (Mai, 2013 [23]) | 3 | 47/M | 32 | Progressive Rt. Hemiparesis | None | Lt. V3-RAG-PCA bypass and surgical BA occlusion | Transient aphasia and Rt. hemiparesis | 2/2 | 14 | Small residual aneurysm |
| Sekhar, 2013 [36] (Mai, 2013 [23]) | 4 | 45/M | 9.2 | SAH | Clipping | Rt. ECA-RAG-PCA bypass with surgical BA occlusion with partial clipping of the aneurysm sac | None | 3/1 | 19 | Complete obliteration |
| Kalani, 2013 [18] | 1 | 51/F | 25 | Memory and speech difficulty, weakness | None | 2 stage procedures:  STA-SCA bypass,  Endovascular BA occlusion | None  (recurrences) | 3/3 | 141 | Recurrences and endovascular retreatment at 1, 2, 5, 6-year F/U; 12-year F/U no filling |
| 2 | 55/F | Large | Headache and neck stiffness | STA-SCA bypass and partial surgical BA occlusion | STA-SCA and STA-PCA bypasses and surgical BA occlusion | Brainstem infarction | 1/6 | 0.5 | Bypass thrombosis |
| 3 | 52/M | Large | Expressive aphasia, upper extremity weakness | Stent insertion | Rt. STA-SCA bypass and surgical partial BA occlusion | None | 3/3 | 36 | Slight enlargement but stable filling |
| Shojima, 2014 [38] | 1 | 74/F | 26 | Headache, cognitive dysfunction | None | Surgical BA occlusion | Delayed rupture causing massive IVH and SAH | 2/6 | 6 | NA |
| Takeuchi, 2015 [42] | 1 | 75/F | Giant | Memory difficulty, gait disturbance | Clipping (18 years earlier),  wrapping (14 years earlier) | Rt. STA-SCA and STA-PCA bypass with surgical partial BA occlusion | Impaired consciousness and oculomotor nerve palsy | 4/5 | 1 | Partial obliteration |
| Alnaes, 2015 [1] | 1 | 55/F | 20 | Headache | None | Endovascular occlusion of both VAs | None | 1/0 | 96 | Enlargement due to wash out of the earlier thrombus but stable filling |
| Indo, 2016 [16] | 1 | 45/F | 3 | SAH | Two times of aborted endovascular treatment | 2 stage procedures:  Lt. STA-MCA bypass,  Rt. STA-MCA bypass | None | 2/0 | 48 | Marked shrinkage of the aneurysm |
| Matsukawa, 2017 [25] | 1 | 66/F | 43 | Oculomotor and abducens nerve palsy | None | STA-SCA and STA-PCA bypasses and surgical BA occlusion | Perforator infarction,  Died of SAH d/t the rupture of the treated aneurysm | 2/6 | 1 | NA |
| 2 | 77/F | 38 | NA | Coil embolization | STA-SCA and STA-PCA bypasses and surgical BA occlusion | Perforator infarction | 2/3 | 12 | NA |
| 3 | 67/F | 33 | NA | None | STA-SCA and STA-PCA bypasses and surgical BA occlusion | Perforator infarction | 3/4 | 12 | NA |
| 4 | 65/M | 28 | NA | None | STA-PCA bypass and direct clipping of the aneurysm | Perforator infarction | 1/5 | 12 | NA |
| 5 | 75/F | 24 | NA | Clipping | STA-SCA and STA-PCA bypasses and surgical BA occlusion | Perforator infarction | 4/4 | 12 | NA |
| 6 | 67/M | 22 | NA | Coil embolization | STA-SCA and STA-PCA bypasses and surgical BA occlusion | Perforator infarction | 3/4 | 12 | NA |
| Pahl, 2017 [31] | 1 | NA | Giant | NA | NA | Bypass and surgical BA occlusion | Bypass graft occlusion,  Died of pneumonia | NA/6 | NA | NA |
| Liu, 2018 [22] | 1 | 15/F | 24 | Diplopia, Lt. side weakness | None | Surgical BA occlusion | None | 3/2 | 60 | Complete obliteration |
| Martinez-Perez, 2018 [24] | 1 | 34/F | Giant | SAH | None | Surgical BA occlusion | De novo giant aneurysm at the Lt. P1-2 junction 25 years after the surgery | 2/0 | 170 | Complete obliteration |
| Ravina, 2019 [34] | 1 | 18/M | 16 | Headache | None | Rt. STA-SCA bypass and surgical BA occlusion | Acute ischemia in the Lt. SCA, pons, Rt. midbrain, Lt. temporal lobe | 1/1 | 9 | Complete obliteration |
| Garcia-Perez, 2020 [10] | 1 | 64/M | 25 | Headache, Lt. ptosis, diplopia | None | Surgical BA occlusion | Transient neurological decline, brainstem compression and hydrocephalus due to intramural aneurysm dissection | 2/0 | 60 | Complete obliteration and marked reduction in size |
| Graffeo, 2023 [11] | 1 | 25/F | 35 | Incidental | None | M2-RAG-RAG-P2 bypass and surgical BA occlusion | Transient oculomotor nerve palsy | 0/0 | 3 | Achieved flow reversal |
| Huang, 2024 [15] | 1 | 58/M | Large, dissecting | SAH | None | Rt. ECA-RAG-PCA bypass and surgical BA occlusion | Pneumonia, hydrocephalus | 5/3 | 16 | Virtually complete thrombosis |
| No, number; FU, follow-up; mos, months; F, female; BA, basilar artery; Lt., left; STA, superficial temporal artery; SCA, superior cerebellar artery; NA, not applicable; RAG, radial artery graft; PCA, posterior cerebral artery; Rt, right; VA, vertebral artery; M, male; MCA, middle cerebral artery; SAH, subarachnoid hemorrhage; PPTA, persistent primitive trigeminal artery; ECA, external carotid artery. | | | | | | | | | | |
